# Supplementary material
Source: Elsevier journal article supplement (https://www.sciencedirect.com/science/article/pii/S2173574321001039)
Supplement: mmc1 [file S2173574321001039:mmc1.pdf]

## Supplement 1 – quality assessment of included studies

| Study                                       | Q1 | Q2 | Q3 | Q4 | Q5 | Q6 | Q7 | Q8 | Q9 | Q10 | Q11 | Q12 | Q13 | Q14 | Quality |
|---------------------------------------------|----|----|----|----|----|----|----|----|----|-----|-----|-----|-----|-----|---------|
| <b>Bello et al, 2017 (7)</b> <sup>1</sup>   | Y  | Y  | Y  | Y  | Y  | Y  | Y  | NA | Y  | N   | Y   | Y   | Y   | Y   | Good    |
| <b>Motegi et al, 2016 (10)</b> <sup>2</sup> | Y  | Y  | NR | N  | Y  | Y  | Y  | Y  | Y  |     |     |     |     |     | Fair    |
| <b>Motegi et al, 2017 (8)</b> <sup>1</sup>  | Y  | Y  | Y  | N  | N  | Y  | Y  | Y  | Y  | N   | Y   | N   | Y   | Y   | Fair    |
| <b>Serri et al, 2013 (11)</b> <sup>2</sup>  | Y  | N  | Y  | N  | Y  | Y  | N  | Y  | Y  |     |     |     |     |     | Poor    |
| <b>Uppal et al, 2014 (9)</b> <sup>3</sup>   | Y  | Y  | N  | N  | N  | Y  | N  | N  | Y  | Y   | N   | N   |     |     | Poor    |

1 - *Quality Assessment of Controlled Intervention Studies*, adapted from the National Institute of Health (NIH)

2 - *Quality Assessment Tool for Case Series Studies*, adapted from the NIH

3 - *Quality Assessment of Case-Control Studies*, adapted from the NIH

Q - question; Y - yes; N - no; NA - not applicable; NR - not reported.

Assessment tools available from: URL: <https://www.nhlbi.nih.gov/health-topics/study-quality-assessment-tools>.
